# Supplementary material
Source: PubMed Central journal article supplement (PMC2820294)
Supplement: NIHMS17559-supplement-01.pdf [file NIHMS17559-supplement-01.pdf]

## **Supplementary Information**

**Figure S1: Linearity for T308 western blot.** Using serially diluted lysates, we probed the linearity of densitometry as described in Materials and Methods.

**Figure S2: Linearity for S473 western blot.** Using serially diluted lysates, we probed the linearity of densitometry as described in Materials and Methods.

**Figure S3: Linearity for Akt kinase activity assay in CHO-EGFR cells.** Using serially diluted lysates, we probed the linearity of the Akt kinase activity assay as described in Materials and Methods.

**Figure S4. An experimental strategy to quantify and correlate Akt phosphorylation and kinase activity.** Two cell types, CHO-EGFR and HT-29, were individually stimulated with EGF (100 ng/ml) or insulin (INS, 500 ng/ml). At each of seven time points distributed throughout two hours, three lysates (biological replicates) per treatment condition were generated. From each lysate, a kinase activity assay and two quantitative western blot against T308 and S473 were performed. Quantification and normalization then allowed comparison between activity and phosphorylation time courses.

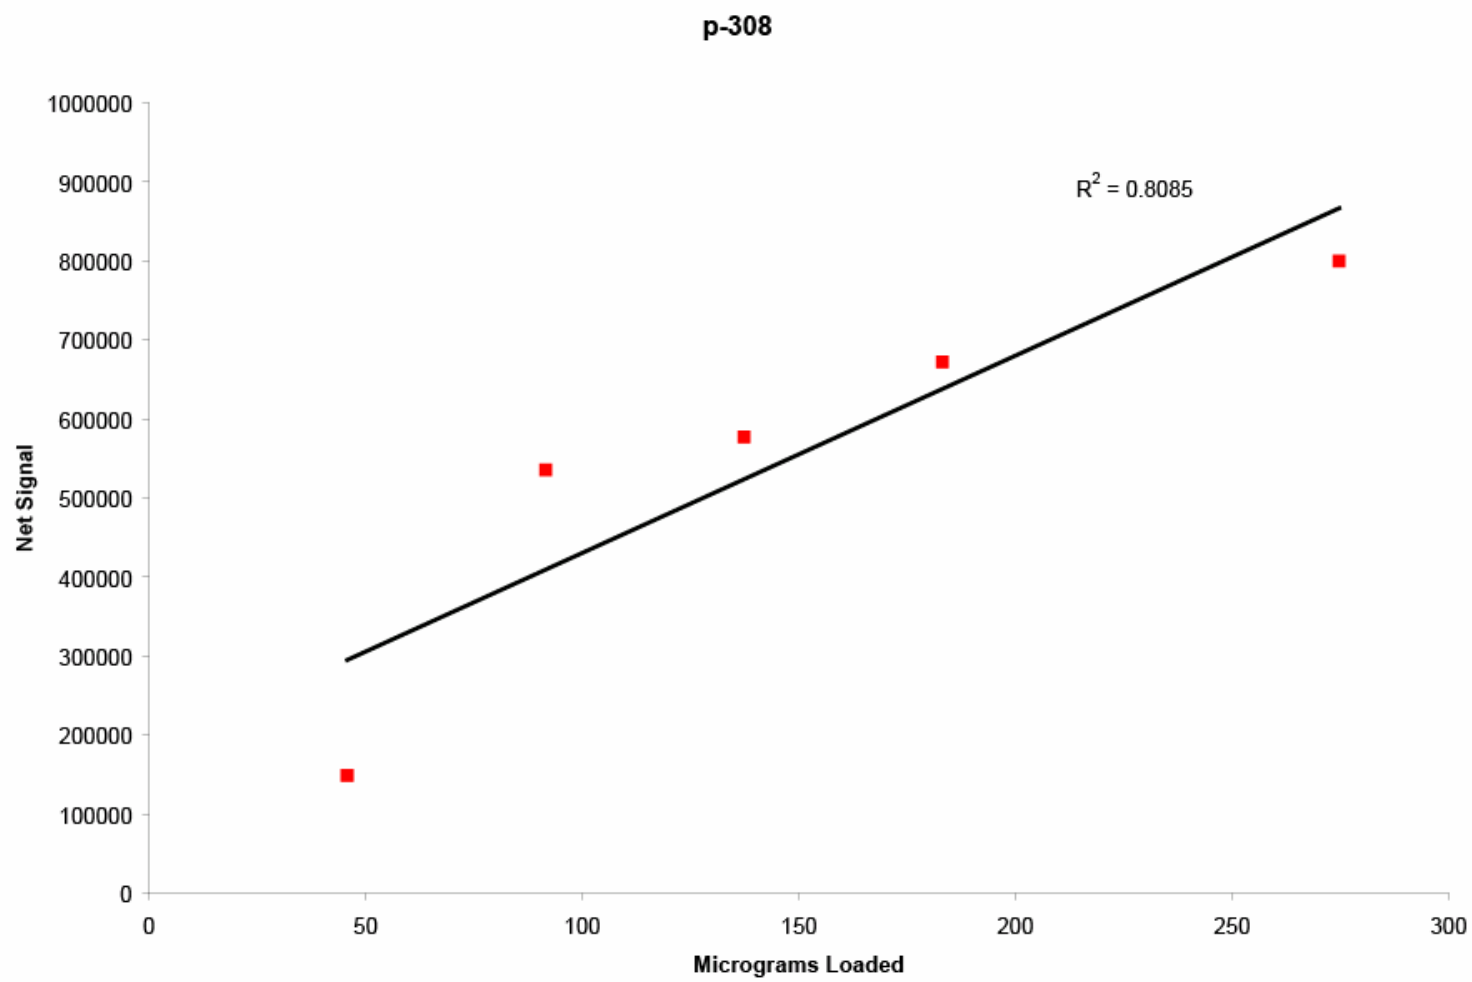

Figure S1

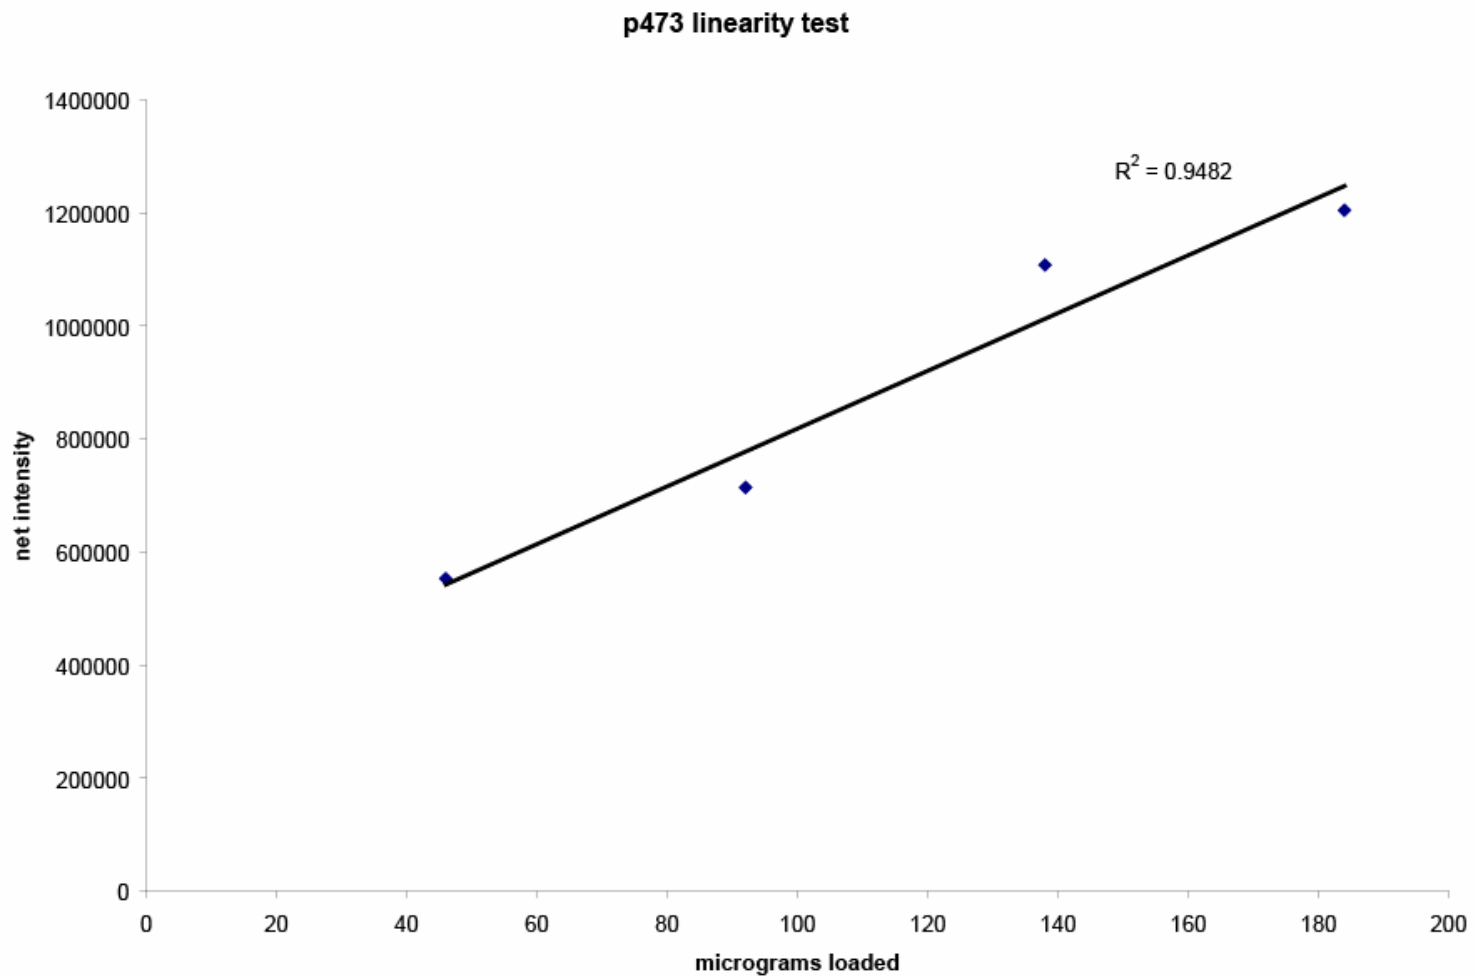

Figure S2

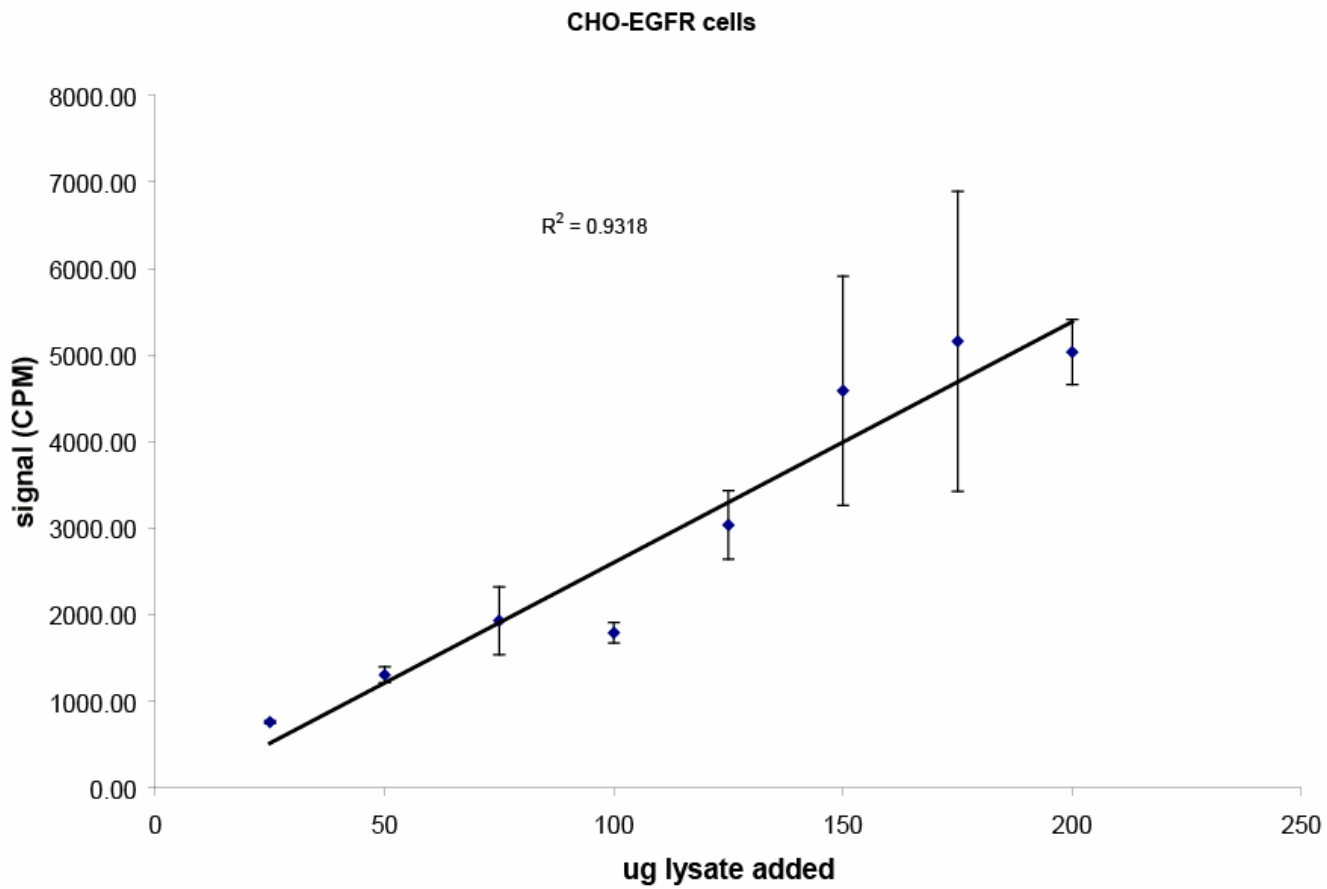

Figure S3

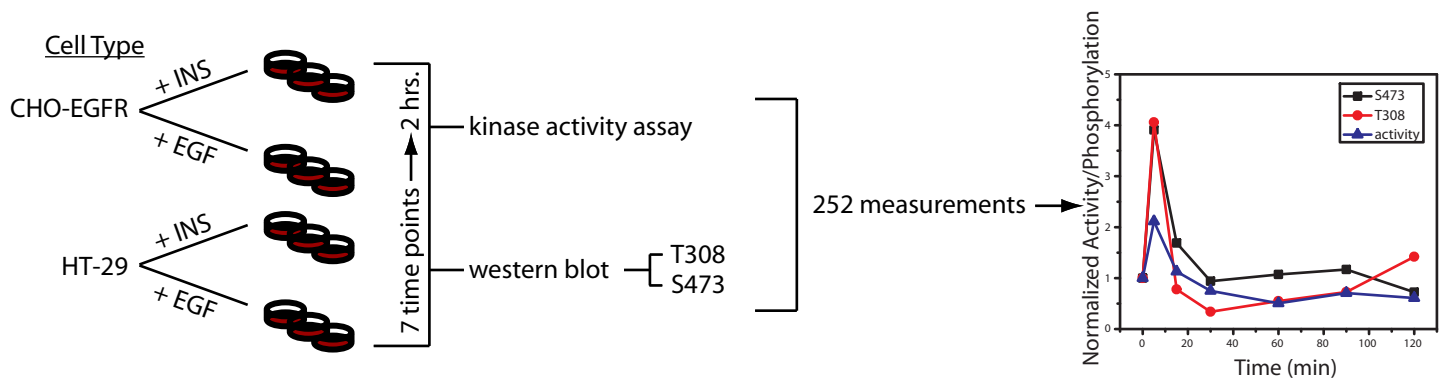

Figure S4
